21 **ABSTRACT**

22 pH has been identified as a master regulator of the soil environment, controlling the  
23 solubility and availability of nutrients. As such, soil pH exerts a strong influence on indigenous  
24 microbial communities. In this study we describe a soil acidification experiment and the resulting  
25 effects on the rhizosphere communities of fir trees on a Christmas tree plantation. The  
26 acidification treatment reduced the pH of bulk soil by ~1.4 pH units and was associated with  
27 reduced Ca, Mg, and organic matter content. Similarly, root chemistry differed due to soil  
28 acidification with roots in acidified soils showing significantly higher Al, Mn, and Zn content  
29 and reduced levels of B and Ca. 16S rRNA and 18S rRNA gene sequencing was pursued to  
30 characterize the bacterial/archaeal and eukaryotic communities in the rhizosphere soils. The  
31 acidification treatment induced dramatic and significant changes in the microbial populations,  
32 with thousands of 16S RNA gene sequence variants and hundreds of 18S rRNA gene variants  
33 being significantly different in relative abundance between the treatments. Additionally, co-  
34 occurrence networks showed that bacterial and eukaryotic interactions, network topology, and  
35 hub taxa were significantly different when constructed from the control and acidified soil rRNA  
36 gene amplicon libraries. Finally, metagenome sequencing showed that the taxonomic shifts in the  
37 community resulted in alterations to the functional traits of the dominant community members.  
38 Several biochemical pathways related to sulfur and nitrogen cycling distinguished the  
39 metagenomes generated from the control and acidified soils, demonstrating the myriad of effects  
40 soils acidification induces to rhizosphere microbes.

41

42

43

44 **IMPORTANCE**

45           Soil pH has been identified as the property that exerts the largest influence on soil  
46 microbial populations. We employed a soil acidification experiment to investigate the effect of  
47 lowering soil pH on the bacterial and eukaryotic populations in the rhizosphere of Christmas  
48 trees. Acidification of the soils drove alterations of fir tree root chemistry and large shifts in the  
49 taxonomic and functional composition of the communities, involving pathways in sulfur and  
50 nitrogen cycling. These data demonstrate that soil pH influences are manifest across all  
51 organisms inhabiting the soil, from the host plant to the microorganisms inhabiting the  
52 rhizosphere soils. Thus, pH is an important factor that needs to be considered when investigating  
53 soil and plant health, the status of the soil microbiome, and terrestrial nutrient cycling.

## 54 INTRODUCTION

55 Current estimates suggest that ~40% of the world's arable soils are acidic (pH 6.0 or  
56 below (1)) and their extent is expanding (2). Broadly reported consequences of soil acidification  
57 are: decreases in plant species richness, lower plant productivity, loss of soil organic carbon  
58 stocks, leaching of nutrients from the soil, and increased N<sub>2</sub>O flux (2–5). In agricultural soils,  
59 soil acidification is generally driven by the application of ammonia, urea, and elemental sulfur  
60 fertilizers, or growth of certain crops such as legumes which can acidify soils (6–8). Soil pH is a  
61 driver of multiple soil characteristics. For instance, soil acidification is linked to lower  
62 concentrations of organic matter, changes in the quality of soil organic matter, and the solubility  
63 and concentration of ions contained in soils (9–11). As such, soil pH is an essential metric in  
64 determining the health and functionality of soils.

65 Soil pH has been identified as one of the primary soil characteristics that influence the  
66 diversity and composition of the indigenous soil microbial communities (12–15). Yet, many of  
67 these studies have been performed at the continental scale, or at sites with a pH gradient, and  
68 thus pH is only one of multiple edaphic factors that differ among sampled locations (9, 15). In  
69 general, studies that investigate the interaction between soil pH and soil microbiology have  
70 focused on bulk soil samples and not the root associated soils that constitute the rhizosphere. As  
71 plant roots absorb and exchange ions with the soil, the pH at the root surface can often be 1-2 pH  
72 units different than surrounding soils (16, 17). For example, when plants absorb NO<sub>3</sub><sup>-</sup> they raise  
73 the pH whereas utilizing NH<sub>4</sub><sup>+</sup> lowers pH (16). Thus, plants influence the local pH of the  
74 rhizosphere and may magnify or dampen bulk soil pH changes for plant associated  
75 microorganisms (18).

76           In this study we describe the results of a soil manipulation study in a Christmas tree farm  
77 planted with Canaan fir (*Abies balsamea* (19)). Rhizosphere samples were collected  
78 approximately six years after the initial acidification treatment. We endeavored to test if the  
79 acidification effect was still present, the influence of the acidification on the nutrient status of the  
80 roots, and the composition of the rhizosphere archaeal, bacterial, and eukaryotic communities  
81 through sequencing of 16S rRNA and 18S rRNA genes. We additionally investigated the  
82 interactions of the rhizosphere communities through co-occurrence networks and the functional  
83 potential of the communities through metagenomic sequencing. Through these efforts we show  
84 that a history of soil acidification induces significant changes in the fir tree root tissue chemistry  
85 as well as the composition and functional potential of the rhizosphere microbial populations.

86

## 87 **MATERIALS AND METHODS**

### 88 *Field site description*

89           Christmas trees of the species *Abies balsamea* (L.) Mill. var. *phanerolepis* Fernald  
90 (Canaan fir) were located in Allen Hill Farm in Brooklyn, Connecticut (41.7696, -71.9183). Plots  
91 were 3.4 by 11.7 m planted with 14 trees at a spacing of 1.7 m between trees with a similar  
92 spacing of 1.7 m between rows. On June 18, 2014 pelletized sulfur (containing 90% sulfur) was  
93 applied to the plots at a rate of 3,370 kg per hectare. The sulfur was incorporated into the soil  
94 manually with a rototiller to a depth of 15 cm. In the soil, elemental sulfur is oxidized to sulfuric  
95 acid, reducing the pH (8). Three-year old 30 cm tall root transplants were planted in the field on  
96 April 13 and 14<sup>th</sup>, 2015. Soil pH was measured in August of 2015 and was 4.1 and 5.9 for the  
97 acidified and control soils, respectively. Samples for this study were collected on June 2<sup>nd</sup>, 2020,  
98 almost six years after the soil acidification was initially performed.

99

100 *Soil chemistry*

101           Soil cores were collected to a depth of 10 cm from interspaces of trees in the same row.  
102           Three cores were collected per row and were composited into a single sample. Three replicate  
103           rows were sampled for both the control and acidified soils, resulting in three independent  
104           replicates for soil chemical analysis. Soil chemistry was performed with the Ag Soil test at  
105           Spectrum Analytic (<https://www.spectrumanalytic.com/>) using standard methods.

106

107 *Root collection*

108           Fine roots were uncovered with an ethanol-sterilized trowel in the vicinity of an  
109           individual tree. Rhizosphere samples were processed in a manner similar to that described by  
110           McPherson *et al.* (20). Briefly, six ~10 cm sections of fir tree fine roots were collected from each  
111           tree and shaken vigorously to remove loosely adhering soil. The root sample was then transferred  
112           to a 50 ml plastic centrifuge tube containing 25 ml of sterile phosphate buffered saline (PBS)  
113           (Ingredients of PBS by weight in 1 liter of deionized water were: 8 g of NaCl, 0.2 g of KCl, 1.44  
114           g of Na<sub>2</sub>HPO<sub>4</sub>, and 0.24 g of KH<sub>2</sub>PO<sub>4</sub>). The samples were then stored on ice until further  
115           processing in the field. Roots were collected from four individual trees per row, with three rows  
116           sampled per soil treatment, resulting in 12 rhizosphere/root samples per soil treatment. The  
117           rhizosphere soil was removed from the roots in the field by vortexing the root samples for 2  
118           minutes at full speed. The roots were then removed with ethanol-sterilized forceps and  
119           transferred to a sterile plastic sample bag. The soil remaining in the centrifuge tube after  
120           vortexing was considered the rhizosphere sample and was immediately stored on dry ice. Root  
121           and rhizosphere samples were transported to the lab in New Haven, Connecticut. The

122 rhizosphere samples were stored at -80 °C, while the root samples were stored at -20 °C until  
123 further processing.

124

#### 125 *Root nutrient analysis*

126 To analyze elemental content in the roots, tissues were oven-dried at 65 °C for 48 h.  
127 About 0.2 g per dried sample was digested with 4 ml of concentrated nitric acid (~ 70%) for 45  
128 min at room temperature, and for an additional 45 min at 115 °C in a hot block (DigiPREP  
129 System; SCP Science, Champlain, NY). After cooling, the final volume was fixed with deionized  
130 water. The elemental profile of the digests was determined by inductively coupled plasma optical  
131 emission spectroscopy (ICP-OES; iCAP 6500, Thermo Fisher Scientific, Waltham, MA).  
132 Yttrium was employed as an internal standard and a multi-element sample of known  
133 concentrations within the run for quality control purposes.

134

#### 135 *Rhizosphere DNA extraction*

136 The frozen rhizosphere samples were removed from the -80 °C freezer and rapidly  
137 thawed in a 55°C water bath. Soil particles and cells were collected by centrifugation at 14,000  
138 rpm for 10 min at 4°C. DNA was extracted from the 0.25 g of soil from the resulting pellet using  
139 the DNeasy PowerSoil Kit (Qiagen). DNA extractions were verified by gel electrophoresis in a 1%  
140 agar gel.

141

#### 142 *Amplification of 16S rRNA and 18S rRNA genes*

143 Bacteria and archaea 16S rRNA genes were amplified with the 515F  
144 (GTGYCAGCMGCCGCGGTAA) and 806R (GGACTACNVGGGTWTCTAAT) primer pair

145 (21). Extracts were each amplified with 10  $\mu$ L Platinum SuperFi II DNA Polymerase  
146 (Invitrogen), which also included 7.5  $\mu$ M of both the mPNA and pPNA peptide nucleic acid  
147 (PNA) clamps (mPNA: GGCAAGTGTTCTTCGGA and pPNA: GGCTCAACCCTGGACAG)  
148 to block amplification of host plant mitochondria and plastid rRNA genes, respectively (22).  
149 PCR conditions consisted of 94 °C for 2 min followed by 30 cycles of 94 °C for 15 s, 60°C for 15  
150 s, 68 °C for 15 sec, and 4 °C for infinite hold. The resulting amplification products were verified  
151 by gel electrophoresis and cleaning and normalization of individual PCR products was  
152 performed with SequalPrep™ Normalization Plate (96) Kit (Invitrogen). The normalized PCR  
153 amplicons were mixed, and the quantity and quality of the DNA pool was verified using an  
154 Agilent TapeStation. The resulting 16S rRNA gene amplicons were submitted to the Yale Center  
155 for Genome Analysis for sequencing on the Illumina MiSeq platform using 2×250 bp chemistry.

156 For eukaryotic 18S rRNA gene amplification we first undertook to design a method to  
157 block the amplification of 18S rRNA genes from the host tree. A new peptide nucleic acid (PNA)  
158 clamp was designed based on the pipeline described in Taerum *et al.* (23). To obtain a reference  
159 18S rRNA sequence for PNA clamp design, DNA was extracted from *A. balsamea* needles using  
160 a GeneJET Plant Genomic DNA purification Mini Kit (Thermo Scientific), following the  
161 manufacturer's directions for DNA purification from lignified polyphenol-rich plant tissues. A  
162 170 bp fragment of the 18S rRNA gene was amplified with the primers Euk1391F (5'-GTACA  
163 CACCGCCCGTC-3') and EukBr (5'-TGATCCTTCTG CAGGTTACCTAC-3') (24). This  
164 fragment includes the V9 hypervariable region, which is one of the most frequently targeted  
165 regions for high throughput sequencing of eukaryotes. PCR was performed as described in  
166 Taerum *et al.*, 2020 (23). The fragment was sequenced at The Keck DNA Sequencing Facility at  
167 Yale on an Applied Biosystems 3730xL DNA Analyzer.



168 PNA clamp design consisted of *in silico* fragmentation of the *A. balsamea* V9 sequence  
169 into 15-17 bp k-mers, which were then mapped to the SILVA database containing animal, plant  
170 and protist sequences (25). K-mers that did not match any animal, plant or protists sequences  
171 were then screened using PNA TOOL ([https://www.pnabio.com/support/PNA\\_Tool.htm](https://www.pnabio.com/support/PNA_Tool.htm)) to  
172 ensure the clamp had a melting temperature between 76 and 82°C and consisted of fewer than 35%  
173 guanines and 50% purines. The selected clamp (AbiesV9\_01, with the sequence  
174 GTTCGCCGTCTTCGACG) was synthesized by PNA Bio, Inc. (Newbury Park, CA, U.S.A.).

175 Quantitative PCR was used to test the effectiveness of the clamp at different  
176 concentrations. Reactions consisted of 1 x SsoAdvanced Universal SYBR Green Supermix (Bio-  
177 Rad, Hercules, CA, U.S.A.), 0.5 µM of each primer, and 2 ng template for a total reaction  
178 volume of 10 µL. AbiesV9\_01 was added to the reactions at a range of concentrations (0, 0.75,  
179 1.5, 3.75, and 7.5 µM), with each reaction concentration being conducted in triplicate. Reactions  
180 were conducted on a CFX96 Touch Real-Time PCR machine (Bio-Rad) Thermal cycler and  
181 consisted of an initial denaturing step of 95°C for 2 minutes, followed by 40 cycles of 95°C for  
182 10 s and 60°C for 15 s. A concentration of 7.5 µM was selected as it suppressed amplification of  
183 host 18S rRNA genes and matched the concentration used for 16S rRNA gene amplification.

184 Rhizosphere 18S rRNA genes were amplified with the primer pair 1391F and EukBr with  
185 Platinum SuperFi II DNA Polymerase (Invitrogen) along with the 7.5 µM of the AbiesV9\_01  
186 PNA clamp. The reaction conditions were 95 °C for 2 min, followed by 30 cycles of 95 °C for 15  
187 s, 78 °C for 10 s, 60 °C for 30 s, and 72 °C for 30 s, and 4 °C for an infinite hold. The 18S rRNA  
188 amplicons were cleaned and normalized identically as for the 16S rRNA gene amplicons and  
189 submitted to the Yale Center for Genome Analysis for sequencing on the Illumina MiSeq  
190 platform using 2x250 bp chemistry.

191

192 *Amplicon sequence analysis*

193 Both 16S rRNA and 18S rRNA gene sequences were initially processed using the mothur  
194 software package (v. 1.44.2(26)). Quality filtering consisted of generating contigs and selecting  
195 for sequences of at least 253 b.p. in length for 16S rRNA genes and 80 b.p. in length for the 18S  
196 rRNA gene datasets. Chimeric sequences were identified with the VSEARCH algorithm (27) as  
197 implemented in mothur, using the most abundant sequences as a reference for chimera detection.  
198 All putative chimeric sequences were removed from the datasets. The 16S rRNA were classified  
199 against the SILVA v132 reference database using the RDP naïve Bayesian classifier (29) as  
200 implemented in mothur, and sequences identified as belonging to chloroplasts were removed  
201 (25). 18S rRNA gene sequences were classified with the PR<sup>2</sup> database, also using the RDP naïve  
202 Bayesian classifier, and sequences identified as unclassified Eukaryotes were removed (28). The  
203 resulting set of sequences in both datasets were assigned to Amplicon Sequence Variants (ASVs)  
204 employing a 100% sequence similarity threshold.

205 The mothur output files were imported into the phyloseq R package for descriptive and  
206 statistical analyses (30). Prior to alpha-diversity calculations and NMDS ordinations the  
207 sequence datasets were subsampled (random without replacement) to the size of the smallest  
208 dataset to maintain equal sampling between datasets. To identify statistically significant  
209 differences in phylum taxonomic bins and ASV relative abundance unnormalized ASV count  
210 data was employed. Rare ASVs, consisting of 5 or less sequences, present in less than 20% of the  
211 samples were removed. Data were normalized using centered log-ratio transformations and  
212 statistically significant differences were identified with the ALDEX2 package (31).

213

214 *Network analysis*

215 Co-occurrence networks were analyzed on ASVs consisting of at least 50 sequences for  
216 both the 16S rRNA and 18S rRNA gene sequence datasets. This resulted in a combined dataset  
217 of 396 ASVs (317 16S rRNA and 79 18S rRNA). Networks were analyzed with the NetCoMi  
218 package in the R software suite (32) employing the SPIEC-EASI metric for network construction  
219 (33). Associations were estimated with the SPRING approach (34) with the default  
220 normalization and zero handling settings. The nlambda and replication numbers were set to 100  
221 and 20, respectively.

222

223 *Shotgun metagenomic sequencing*

224 DNA samples from individual trees in the same row (i.e. 4 trees) were composited at  
225 equal molar ratio to produce templates for metagenome sequencing. In this manner, three  
226 replicate samples were sequenced for each soil treatment. Sequencing libraries were prepared  
227 using the Ligation Sequencing Kit (SQK-LSK109; Oxford Nanopore) and individually barcoded  
228 with the Native barcoding Expansion (EXP-NBD104; Oxford Nanopore). Libraries were  
229 sequenced for 72 hours on the Oxford Nanopore MinIon with the MinION Flow Cell (R9.4.1).  
230 Basecalling was performed with the Guppy software (4.2.2) using the accurate basecalling model.  
231 The resulting Fastq files were assembled with the Flye assembly software (2.8-b1674), using the  
232 metagenome settings (35, 36). A round of assembly polishing was performed with Racon v.  
233 1.4.19 (37) followed by a second round of polishing with Medaka (v. 1.2.3  
234 <https://nanoporetech.github.io/medaka/>) using default parameters. The resulting contigs were  
235 binned with metaBAT2 (38) and the resulting assembly bins were assessed with CheckM for  
236 completeness and contamination (39). Genes were identified and translated with the CheckM

237 implementation of Prodigal (40) and the resulting amino acid sequences were assigned to KEGG  
238 pathways with the GHOSTX webserver (41–43)

239

## 240 **RESULTS**

### 241 *Soil Chemistry*

242 In 2020, six years after the initial sulfur treatment the pH of the acidified soils remained  
243 approximately 1.4 pH units lower than the control soils (Table 1). Soil acidification was also  
244 associated with significantly lower calcium, magnesium, and organic matter content than the  
245 control soils (Table 1). Thus, the effects of the pH treatment were still apparent during the  
246 current study and influenced several other soil parameters.

247

### 248 *Root tissue analysis*

249 The mineral nutrition status of the root tissue was analyzed by ICP-OES. Three elements,  
250 B, Ca, and Na were present at significantly lower concentrations in roots from the acidified soils  
251 (36%, 47%, and 31% lower, respectively) whereas Al, and Zn were significantly more abundant  
252 in the roots from the acidified soils (56% and 47% higher; Figure 1). Note that prior to the ICP  
253 analysis the roots were rinsed with PBS to remove rhizosphere soil. This procedure may have  
254 influenced the measured values for Na, P, and K, and so the values we report for these elements  
255 should be considered relative rather than absolute values in the root tissue for comparisons  
256 between the roots in control and acidified soils. Yet, these data clearly demonstrate that the  
257 acidification treatment of the soils translated into altered chemistry of the fir tree root tissue.

258

### 259 *Diversity of 16S rRNA and 18S rRNA gene libraries*

260 Sequencing of the 16S rRNA gene was pursued to investigate the Bacterial and Archaeal  
261 populations in the fir tree rhizosphere whereas 18S rRNA gene sequencing was used to  
262 characterize the Eukaryotic populations. The alpha diversity of the 16S and 18S rRNA gene  
263 libraries was assessed to determine if the acidification treatment influenced community diversity  
264 of the fir tree rhizosphere. A statistically higher number of 16S rRNA gene amplicon sequence  
265 variants (ASVs) were recovered from roots in the control soils (mean 44,830 ASVs) compared to  
266 the acidified soils (39,868 ASVs), an 11% decrease in the number of recovered ASVs (Figure  
267 2A). Similarly, the Shannon's Diversity Index of the 16S rRNA gene libraries was significantly  
268 higher in the control soils (Figure 2B). For the 18S rRNA gene libraries, a mean of 4,266 ASVs  
269 were recovered from the control rhizospheres versus a mean of 3,734 ASVs from roots in the  
270 acidified soils (Figure 2A), a 12% decrease in association with the acidification treatment. Yet,  
271 for the 18S rRNA gene libraries the Shannon's Diversity Index was similar between the control  
272 and acidified samples (Figure 2B). Taken together, these data suggest that the 16S rRNA gene  
273 datasets were more diverse than the 18S rRNA gene datasets, pointing to a more diverse  
274 bacterial/archaeal community in comparison to their eukaryotic counterparts. Additionally, the  
275 acidification treatment was associated with a significant decrease in the number of recovered  
276 ASVs for both the 16S and 18S rRNA gene libraries, suggesting that soil acidification resulted in  
277 a trend towards decreased diversity of both the 16S rRNA and 18S rRNA gene amplicon datasets.

278

### 279 *Alterations in 16S rRNA libraries due to soil acidification*

280 The relationship between sequence datasets was visualized with non-metric  
281 multidimensional scaling (NMDS) and showed that the control datasets clearly clustered  
282 distinctly from the acidified samples, with a P-value  $\leq 0.001$  (Figure 3A). Communities for each

283 tree with acidified soil had greater inter-sample distances in the NMDS plot, suggesting that soil  
284 acidification inflated community heterogeneity amongst individual rhizosphere samples. This  
285 was confirmed by comparing the inter-sample dissimilarity between samples, which was larger  
286 for the datasets from acidified soil and was highly significant ( $P \leq 0.0001$ ; Figure S1).

287 The 16S rRNA gene sequences were classified to the phylum level. A total of 37 phyla  
288 were identified in the dataset, with the five most abundant phyla generally making up >75% of  
289 sequence reads (Figure 3B). Overall, the relative abundance of phyla was similar between the  
290 control and acidified rhizospheres. Yet, 20 phylum level bins were identified as significantly  
291 different in relative abundance due to the pH treatment (Table S1). For instance, an increase of  
292 Proteobacteria was associated with acidification, rising from 35% of the control sequence libraries  
293 to 42% in the pH treatments. Taken together these data show that the pH treatment was  
294 associated with shifts in the taxonomic composition of the rhizosphere communities at broad  
295 taxonomic levels.

296 We additionally tested for significant differences in ASV relative abundance due to soil  
297 acidification. Thousands of ASVs were found to be significantly different in response to the pH  
298 treatment (Figure 3C). The differentially abundant (DA) ASVs belonged to 15 different phyla  
299 (Figure 3C). Most of the DA ASVs belonged to the phylum Proteobacteria matching their  
300 dominance in the datasets (Figure 3B). However, the second largest class of DA ASVs were the  
301 Planctomycetes, which were among the rare “other” phyla in the rhizosphere (Figure 3B, 3D).  
302 Yet, Proteobacteria and Planctomycete-related ASVs were identified as being enriched in both  
303 the control and acidified soils, suggesting that there was not a consistent response across the  
304 groups. There were some DA ASVs that belonged to phyla specifically enriched in the acidified  
305 soils, namely the Latescibacteria, Rokubacteria, Spirochetes, and the archaeal phylum

306 Thaumarchaeota. Similarly, WPS-2 related DA ASVs were unique to the control soils (Figure  
307 4D). These observations are likely influenced by the relative rareness of these taxa in the datasets  
308 (Figure 3B) and thus may not be a true reflection that these taxa are particularly sensitive to the  
309 acidification treatment. The DA ASVs could be further classified to 508 different genus level  
310 bins (Figure 4C, inset Venn diagram). An interesting observation was that a large proportion of  
311 the differentially abundant genus-level bins (226 or 44%) contained genera with ASVs that were  
312 identified as being more abundant in both the control and acidified soils. This suggests that much  
313 of the response to acidification was occurring at a sub-genus level, *i.e.*, between species of the  
314 same genus, or even specific ASVs. Taken together, these data show that a diverse set of taxa  
315 were identified as responding to the soil acidification treatment and few taxa showed a particular  
316 sensitivity to soil acidification in one direction or the other.

317

### 318 *Alterations in 18S rRNA libraries due to soil acidification*

319 Assigning 18S rRNA genes to ASVs and visualizing sample relatedness by NMDS  
320 demonstrated a significant independent clustering of the control and acidified datasets ( $P < 0.001$ ;  
321 Figure 4A). However, contrary to the 16S rRNA datasets the average pairwise distance between  
322 control and acidified samples was not significantly different (Figure S1). This suggests that  
323 heterogeneity between populations was similar between the control and acidified rhizospheres  
324 for the Eukaryotes.

325 The 18S rRNA genes were classified to explore the relative abundance of taxa in the  
326 datasets (Figure 4B). There were wide variations in the average relative abundance of 18S rRNA  
327 taxonomic bins between the control and acidified soil datasets. For example, the percent of  
328 sequences related to the Fungi increased from an average of 39% of control samples to 56% in

329 the acidified soils, yet the differences were not significant. In fact, only a single taxonomic bin,  
330 the Conosa (a subphylum of the Amoebozoa) was identified as significantly different between  
331 the control and acidified soils, being more abundant in the control soils (Table S1).

332 A multitude of 18S rRNA ASVs were identified as DA due to the acidification treatment  
333 (Figure 4C). The DA ASVs belonged to 15 different taxonomic ranks, with 4 unclassified bins  
334 (Figure 4D). The DA ASVs could be further classified to 84 genus level bins (Figure 4D, inset  
335 Venn diagram). One observation of note was that the largest proportion of DA ASVs belonged to  
336 the group Cercozoa (Figure 4D), although they were not particularly abundant across the datasets  
337 (Figure 4B). This suggests these organisms may be particularly sensitive to the acidification  
338 treatment among the Eukaryotes. Yet, the Cercozoa often act as bacterivorous predators, with  
339 different feeding strategies (44). In this regard, it is unclear if the Cercozoa are responding to the  
340 soil acidification *per se* or an alteration of their prey bacterial populations with acidification. In  
341 any case, the data shown here also supports that a wide array of the Eukaryotic rhizosphere  
342 communities were sensitive to changes in soil pH, whether this was a response to environmental  
343 conditions or changes in the plant health status or bacterial communities remains to be  
344 demonstrated.

345

#### 346 *Network analysis*

347 Co-occurrence networks were constructed to characterize bacteria, archaea, and  
348 eukaryotic interactions. To focus on the most abundant ASVs, only those ASVs with sequence  
349 counts greater or equal to 50 and present in both control and acidified datasets were retained. The  
350 resulting dataset consisted of 317 16S rRNA gene ASVs and 79 18S rRNA gene ASVs. The co-  
351 occurrence network is diagrammed in Figure 5A. Qualitative differences in the network



352 structure are readily apparent from inspecting the network structure. Quantitatively, the Adjusted  
353 Rand index between the two networks was 0.016 (two-tailed t-test  $P < 0.001$ ), suggesting that  
354 there were highly significant differences in the network topology between the control and  
355 acidified soils. Similarly, measurements of network degree (number of connections), eigenvalue  
356 centrality (connectedness of nodes) and the hub taxa (taxa that are most connected to other taxa,  
357 similar to “keystone” species) all significantly differed between the two networks (Figure 5).  
358 Finally, the most central hub taxa were identified for each network (Figure 5B). All of the 5 most  
359 central taxa in the control network were bacteria, whereas two Eukaryotes are present in the  
360 central taxa of the acidified soil network. In this regard, these data show that the soil acidification  
361 treatment did not only alter the structure of the soil community, it also altered how taxa interact  
362 and the keystone species that support the community.

363

#### 364 *Metagenomic sequencing and functional potential of the rhizosphere communities*

365 Bulk sequencing of metagenomic DNA was undertaken to describe the functional gene  
366 repertoire of the fir tree rhizosphere communities. Assembly and binning of the reads produced  
367 17 bins from the control metagenomes and 25 bins from the acidified soils (Table S2). The  
368 average length of the metagenomic bins was 5.4 Mbp with an average completeness and  
369 contamination of 27% and 7%, respectively. None of the assemblies meet the suggested  
370 qualifications of even a medium-quality metagenome assembled genome (>90% completion and  
371 contamination <5% (45)). Furthermore, a majority of the bins could only be classified to broad  
372 taxonomic ranks, with 6 bins being classified to “root” and a further 26 classified to the level of  
373 Bacteria (Table S2). Thus, for the remainder of the metagenome analyses the focus is on the  
374 genes encoded across the metagenomes rather than focusing on particular Bins.

375           A total of 127,547 and 157,542 genes were identified in the control and acidified  
376 metagenomes, respectively. Of these genes 25.8% and 24.4% were functionally annotated. The  
377 KEGG annotations were assigned to pathway modules and a total of 109 and 118 complete  
378 modules were identified in the control and acidified metagenomes. Investigating modules that  
379 were complete in one treatment but incomplete or absent in the other identified several  
380 biochemical pathways that differentiated the control and acidified soils (Table 2). For example,  
381 the control metagenomes encoded biosynthesis pathways for isoleucine and thiamine whereas  
382 the acidified metagenomes encoded salvage pathways (methionine and thiamine, Table 2). This  
383 suggests that the organisms in the control soils may be largely capable of *de-novo* synthesis of  
384 amino acids and nucleotides. In contrast, the acidified metagenomes point to auxotrophic  
385 pathways requiring amino acid and nucleotide recycling. Another pattern that differentiated the  
386 metagenomes was the terminal oxidases identified. Cytochromes of the Cytochrome *c* oxidase,  
387 *cbb3*-type and Cytochrome *o* ubiquinol oxidase in the control soils and Cytochrome *bd* ubiquinol  
388 oxidase in the acidified soils. The terminal oxidases in bacteria are regulated based on  
389 environmental conditions and can be differentially expressed due to oxygen status, pH, and  
390 available electron acceptors (46). Thus, the presence of different cytochromes in the  
391 metagenomes between treatments points to adaptations of the microbial communities to  
392 inhabiting the control and acidified soils. Finally, the metagenomes from the acidified soils  
393 encoded pathways for assimilatory nitrate reduction, indicating a conversion of nitrates to  
394 ammonia (47), indicating pathways for nitrogen cycling may have also differed between control  
395 and treatment soils. It should be noted that these metagenomes were not exhaustively sampled,  
396 so the absence of these pathways in one treatment or the other cannot be taken for an absolute

397 lack of that pathway. Instead, these data suggest that these pathways are not present amongst the  
398 most abundant organisms that inhabit the soils from the two treatments.

399

## 400 **DISCUSSION**

401 Soil pH has been identified as a master variable controlling nutrient availability and plant  
402 productivity in agricultural soils (48). Here we observe that the soil acidification treatment led to  
403 altered mineral nutrient status for the fir tree roots. Specifically, the concentration of Al, Mn, and  
404 Zn in the root tissue were significantly higher in root tissues from the acidified soils in  
405 comparison to the controls (Figure 1). Al is generally abundant in soil but is not considered to be  
406 an essential nutrient for plants, and even micromolar amounts of Al in root tissue can be toxic  
407 (49). Al toxicity can alter root morphology, lead to deficiencies in other nutrients such as Ca, and  
408 cause genetic damage through interactions with plant cellular DNA (reviewed in 38). In  
409 comparison, Mn and Zn are required components of the photosynthesis proteins in plants and are  
410 thus considered essential nutrients (51). Yet, both nutrients also show toxic effects when  
411 provided in excess (52). Thus, these data point to potential stressors in the root tissue related to  
412 metal toxicity. In contrast, the levels of B and Ca were reduced in root tissues (Figure 1). B and  
413 Ca both play roles in plant cell wall synthesis, and deficiencies are associated with poor plant  
414 health (53–55). It is important to note that the trees in the field, including those in the acidified  
415 soils, did not show any observable symptoms of phytotoxicity or nutrient deficiency. Indeed, the  
416 Canaan fir in this trial is a species adapted to growing in very acid soil; the trees in the acidified  
417 plots have shown better growth and color than those growing at a higher soil pH (19). Yet, these  
418 observed differences in root mineral nutrient status in association with soil acidification are

419 likely to alter root physiology which presumably could translate into the alterations of the root-  
420 associated microbial community in the rhizosphere.

421 Multiple lines of evidence support that the rhizosphere communities were significantly  
422 and dramatically altered in association with soil acidification. Lower soil pH was associated with  
423 reductions in alpha-diversity of both the 16S rRNA and 18S rRNA gene datasets, indicating both  
424 the bacterial/archaeal and eukaryotic populations were less diverse under soil acidification.

425 Although, the effect and significance were greater for the bacterial/archaeal 16S rRNA gene  
426 datasets than for the 18S rRNA genes (Figure 2). Multiple studies have reported a reduction of  
427 alpha diversity for microbial populations under soil acidification (56). Thus, a reduction in  
428 diversity under soil acidification appears to be a common phenomenon across multiple soil  
429 environments.

430 NMDS clustering, differential abundance of taxonomic bins and ASVs (Figures 3&4),  
431 and network analysis (Figure 5) all pointed to an altered microbial community structure in the  
432 rhizospheres from control soils in comparison to their acidified counterparts. While other studies  
433 have identified particular taxa, such as the Acidobacteria and Actinobacteria as being particularly  
434 responsive to soil acidification (18, 57), the data presented here suggests a more generalized  
435 response across the community. There was not a strong taxonomic signal in the differentially  
436 abundant organisms identified. In the 16S rRNA datasets, multiple phylum-level taxonomic bins  
437 and thousands of ASVs belonging to hundreds of individual genera shifted in abundance due to  
438 decreased pH (Figure 3). Similar patterns were observed in the 18S rRNA datasets (Figure 4).  
439 This broad taxonomic response is likely related to the observation of increased heterogeneity in  
440 the rhizosphere communities in the acidified soils, particularly for the 16S rRNA gene datasets  
441 (Figure 3A & Figure S1). It has long been recognized that the “coefficient of variation” is a

442 useful tool to assess the stability of ecological communities, where increased variability is a  
443 signal of reduced ecological stability (58). In this respect, we propose that the acidified soils may  
444 not yet have converged on a stable state, even 6 years after disturbance. Alternatively, the  
445 addition of pelletized sulfur to the soil may have simply increased the environmental  
446 heterogeneity of the soil, resulting in pH hot spots and cold spots, translating into an elevated  
447 inter-sample divergence. Of course, these hypotheses are not mutually exclusive. Yet, taken  
448 together these data suggest that a large effect of the soil acidification was a generalized increase  
449 in the heterogeneity among the rhizosphere communities, including archaea, bacteria, and  
450 eukaryotes, rather than a targeted enrichment or depletion of specific populations.

451         The large shifts in the taxonomic composition of the soil communities were accompanied  
452 by several biochemical pathways that differentiated the functional potential of the sequences  
453 recovered from metagenome sequencing of the control and acidified soils (Table 2). For instance,  
454 soil acidification was associated with an alteration in terminal oxidases of the respiratory chain  
455 encoded in the metagenomes. Genomes from the control soils encoded cytochromes from the  
456 cytochrome *c* and cytochrome *o* families, whereas the acidified genomes possessed the genes for  
457 cytochrome *bd* (Table 2). Cytochromes of the *bd* family are induced under conditions that are  
458 often stressful, such as low O<sub>2</sub> concentrations (59). In *Escherichia coli* cytochrome *bd* is  
459 involved in preventing respiratory inhibition by hydrogen sulfide (60). Given that the method of  
460 soil acidification was through addition of sulfur and its interconversion to hydrogen sulfide and  
461 sulfuric acid, the presence of cytochrome *bd* may have been protective for the microbes in the  
462 acidified soils. This is not the only link to sulfur cycling observed in the metagenomes.  
463 Thiosulfate oxidation via the SOX complex was identified as a functional pathway in the control  
464 soils but was missing in the acidified soils. Previous studies investigating elemental sulfur

465 cycling in soils identified that *soxB* genes are reduced in abundance and diversity with  
466 acidification (61). Thus, these metagenomic data support that the acidification of the soil via  
467 elemental sulfur did appear to affect sulfur cycling in the fir tree rhizosphere communities.  
468 Additionally, enrichment of cytochrome *bd* is also associated with resistance to nitrosative stress,  
469 i.e. the stress induced by excess NO (62). NO is a potent inhibitor of terminal oxidases of the *c*  
470 and *o* families as well as inducing oxidative stress (63). Consequently high concentrations of NO  
471 in the environment induce a suite of physiological responses. Nitric oxide (NO) is a product of  
472 the reduction of nitrate to ammonia (64), a pathway specifically encoded in the metagenomes in  
473 the acidified soils (Table 2) and thus, indicating a potential for nitrosative stress in the  
474 rhizosphere soils. Taken together, these metagenomic data point to an alteration in the  
475 environmental conditions and nutrient cycling in the rhizosphere community.

476

## 477 **Conclusion**

478 The data presented here demonstrates that the effects of soil acidification are manifest  
479 across the range of organisms that inhabit the soil. This includes changes in the mineral nutrient  
480 status of the host plant as well as compositional alterations in the associated archaeal, bacterial,  
481 and eukaryotic communities that populate the rhizosphere soils. The microbial communities were  
482 less diverse in the acidified soils and alterations in the taxonomic composition of the  
483 communities were evident at multiple taxonomic ranks, suggesting that a wide variety of the soil  
484 microbial community were affected by the acidification treatment. The results of these  
485 taxonomic shifts resulted in an increase in the heterogeneity in community structure amongst the  
486 microbial populations in the acidified soils. This could indicate that the acidified soils are in a  
487 transitional state or inhabit an environment with increased spatial heterogeneity. Finally,

488 metagenome sequencing demonstrated that the taxonomic reshaping of the community translated  
489 into alterations in the functional potential of the indigenous rhizosphere populations. Pathways  
490 involved in carbon, sulfur, and nitrogen cycling were differentially present between the  
491 metagenomes from control and acidified soils, linking the changes in the taxonomic composition  
492 of the communities to their functional potential and nutrient cycling. These data underscore the  
493 importance of soil pH as a driving force in determining the structure and function of soil  
494 communities and highlights the critical research need to integrate plant and microbial responses  
495 in the rhizosphere and their responses to soil acidification.

496

#### 497 **Data accessibility**

498 All 16S rRNA, 18S rRNA amplicon gene libraries, and the shotgun metagenome sequences are  
499 available in the NCBI SRA under the BioProject accession number PRJNA708254. The *Abies*  
500 *balsamea* var. *phanerolepis* 18S rRNA gene sequence is available in Genbank under the  
501 accession number MW699166.1.

502

#### 503 **Acknowledgments**

504 We thank the Christmas Tree Promotion Board for funding “Investigating soil acidification  
505 mechanisms for inhibiting *Phytophthora*”. ST was supported by an AFRI Foundational Program  
506 grant from the United States Department of Agriculture–National Institute of Food and  
507 Agriculture (USDA-NIFA grant number 2019-67019-29315). This work was additionally  
508 supported by the USDA National Institute of Food and Agriculture, Hatch project 1022006  
509 awarded to BS, and Hatch project 1012247 awarded to RSC.

510

511

512

513

514



515 **References**

- 516 1. Soil Survey Staff. 2014. Soil Survey Field and Laboratory Methods Manual. Soil Survey  
517 Investigations Report No. 51, Version 2.0. U.S. Department of Agriculture, Natural  
518 Resources Conservation Service.
- 519 2. Kunhikrishnan A, Thangarajan R, Bolan NS, Xu Y, Mandal S, Gleeson DB, Seshadri B, Zaman  
520 M, Barton L, Tang C, Luo J, Dalal R, Ding W, Kirkham MB, Naidu R. 2016. Functional  
521 Relationships of Soil Acidification, Liming, and Greenhouse Gas Flux, p. 1–71. *In* Advances in  
522 Agronomy. Elsevier.
- 523 3. Azevedo LB, van Zelm R, Hendriks AJ, Bobbink R, Huijbregts MAJ. 2013. Global assessment  
524 of the effects of terrestrial acidification on plant species richness. *Environmental Pollution*  
525 174:10–15.
- 526 4. Raza S, Miao N, Wang P, Ju X, Chen Z, Zhou J, Kuzyakov Y. 2020. Dramatic loss of inorganic  
527 carbon by nitrogen-induced soil acidification in Chinese croplands. *Global Change Biology*  
528 26:3738–3751.
- 529 5. Meng C, Tian D, Zeng H, Li Z, Yi C, Niu S. 2019. Global soil acidification impacts on  
530 belowground processes. *Environ Res Lett* 14:074003.
- 531 6. Haynes RJ. 1983. Soil acidification induced by leguminous crops. *Grass and Forage Science*  
532 38:1–11.
- 533 7. Barak P, Jobe BO, Krueger AR, Peterson LA, Laird DA. 1997. Effects of long-term soil  
534 acidification due to nitrogen fertilizer inputs in Wisconsin. *Plant and Soil* 197:61–69.

- 535 8. Bolan NS, Hedley MJ. 2003. Role of carbon, nitrogen, and sulfur cycles in soil acidification.  
536 Handbook of soil acidity 29–56.
- 537 9. Evans CD, Jones TG, Burden A, Ostle N, Zieliński P, Cooper MDA, Peacock M, Clark JM,  
538 Oulehle F, Cooper D, Freeman C. 2012. Acidity controls on dissolved organic carbon mobility  
539 in organic soils. *Global Change Biology* 18:3317–3331.
- 540 10. Choma M, Tahovská K, Kaštovská E, Bárta J, Růžek M, Oulehle F. 2020. Bacteria but not  
541 fungi respond to soil acidification rapidly and consistently in both a spruce and beech forest.  
542 *FEMS Microbiology Ecology* 96.
- 543 11. Ekström SM, Kritzberg ES, Kleja DB, Larsson N, Nilsson PA, Graneli W, Bergkvist B. 2011.  
544 Effect of Acid Deposition on Quantity and Quality of Dissolved Organic Matter in Soil–Water.  
545 *Environ Sci Technol* 45:4733–4739.
- 546 12. Fierer N, Jackson RB. 2006. The diversity and biogeography of soil bacterial communities.  
547 *PNAS* 103:626–631.
- 548 13. Fierer N. 2017. Embracing the unknown: disentangling the complexities of the soil  
549 microbiome. *Nature Reviews Microbiology* 15:579–590.
- 550 14. Hartman WH, Richardson CJ, Vilgalys R, Bruland GL. 2008. Environmental and  
551 anthropogenic controls over bacterial communities in wetland soils. *PNAS* 105:17842–  
552 17847.

- 553 15. Lauber CL, Hamady M, Knight R, Fierer N. 2009. Pyrosequencing-Based Assessment of Soil  
554 pH as a Predictor of Soil Bacterial Community Structure at the Continental Scale. *Appl*  
555 *Environ Microbiol* 75:5111–5120.
- 556 16. Nye PH. 1981. Changes of pH across the rhizosphere induced by roots. *Plant Soil* 61:7–26.
- 557 17. Wang X, Tang C, Severi J, Butterly CR, Baldock JA. 2016. Rhizosphere priming effect on soil  
558 organic carbon decomposition under plant species differing in soil acidification and root  
559 exudation. *New Phytologist* 211:864–873.
- 560 18. Shen G, Zhang S, Liu X, Jiang Q, Ding W. 2018. Soil acidification amendments change the  
561 rhizosphere bacterial community of tobacco in a bacterial wilt affected field. *Appl Microbiol*  
562 *Biotechnol* 102:9781–9791.
- 563 19. Cowles RS. 2020. Sulfur Amendment of Soil Improves Establishment and Growth of Firs in a  
564 Field Naturally Infested with *Phytophthora*1. *Journal of Environmental Horticulture* 38:15–  
565 21.
- 566 20. McPherson MR, Wang P, Marsh EL, Mitchell RB, Schachtman DP. 2018. Isolation and  
567 Analysis of Microbial Communities in Soil, Rhizosphere, and Roots in Perennial Grass  
568 Experiments. *JoVE (Journal of Visualized Experiments)* e57932.
- 569 21. Alivisatos AP, Blaser MJ, Brodie EL, Chun M, Dangl JL, Donohue TJ, Dorrestein PC, Gilbert JA,  
570 Green JL, Jansson JK, Knight R, Maxon ME, McFall-Ngai MJ, Miller JF, Pollard KS, Ruby EG,  
571 Taha SA, Unified Microbiome Initiative Consortium. 2015. A unified initiative to harness  
572 Earth’s microbiomes. *Science* 350:507–508.

- 573 22. Lundberg DS, Yourstone S, Mieczkowski P, Jones CD, Dangl JL. 2013. Practical innovations  
574 for high-throughput amplicon sequencing. *Nature Methods* 10:999–1002.
- 575 23. Taerum SJ, Steven B, Gage DJ, Triplett LR. 2020. Validation of a PNA Clamping Method for  
576 Reducing Host DNA Amplification and Increasing Eukaryotic Diversity in Rhizosphere  
577 Microbiome Studies. *Phytobiomes Journal* 4:291–302.
- 578 24. Medlin L, Elwood HJ, Stickel S, Sogin ML. 1988. The characterization of enzymatically  
579 amplified eukaryotic 16S-like rRNA-coding regions. *Gene* 71:491–499.
- 580 25. Quast C, Pruesse E, Yilmaz P, Gerken J, Schweer T, Yarza P, Peplies J, Glöckner FO. 2012. The  
581 SILVA ribosomal RNA gene database project: improved data processing and web-based  
582 tools. *Nucl Acids Res* D590-6.
- 583 26. Schloss PD, Westcott SL, Ryabin T, Hall JR, Hartmann M, Hollister EB, Lesniewski RA, Oakley  
584 BB, Parks DH, Robinson CJ, Sahl JW, Stres B, Thallinger GG, Horn DJV, Weber CF. 2009.  
585 Introducing mothur: Open-source, platform-independent, community-supported software  
586 for describing and comparing microbial communities. *Appl Environ Microbiol* 75:7537–7541.
- 587 27. Rognes T, Flouri T, Nichols B, Quince C, Mahé F. 2016. VSEARCH: a versatile open source  
588 tool for metagenomics. *PeerJ* 4:e2584.
- 589 28. Guillou L, Bachar D, Audic S, Bass D, Berney C, Bittner L, Boutte C, Burgaud G, de Vargas C,  
590 Decelle J, del Campo J, Dolan JR, Dunthorn M, Edvardsen B, Holzmann M, Kooistra WHCF,  
591 Lara E, Le Bescot N, Logares R, Mahé F, Massana R, Montresor M, Morard R, Not F,  
592 Pawlowski J, Probert I, Sauvadet A-L, Siano R, Stoeck T, Vaultot D, Zimmermann P, Christen R.

- 593 2013. The Protist Ribosomal Reference database (PR2): a catalog of unicellular eukaryote  
594 Small Sub-Unit rRNA sequences with curated taxonomy. *Nucleic Acids Res* 41:D597–D604.
- 595 29. Cole JR, Chai B, Farris RJ, Wang Q, Kulam SA, McGarrell DM, Garrity GM, Tiedje JM. 2005.  
596 The Ribosomal Database Project (RDP-II): sequences and tools for high-throughput rRNA  
597 analysis. *Nucleic Acids Res* 33:D294–D296.
- 598 30. McMurdie PJ, Holmes S. 2013. phyloseq: an R package for reproducible interactive analysis  
599 and graphics of microbiome census data. *PloS one* 8:e61217.
- 600 31. Fernandes AD, Macklaim JM, Linn TG, Reid G, Gloor GB. 2013. ANOVA-Like Differential  
601 Expression (ALDEx) Analysis for Mixed Population RNA-Seq. *PLoS ONE* 8:e67019.
- 602 32. Peschel S, Müller CL, von Mutius E, Boulesteix A-L, Depner M. 2020. NetCoMi: network  
603 construction and comparison for microbiome data in R. *Briefings in Bioinformatics*  
604 <https://doi.org/10.1093/bib/bbaa290>.
- 605 33. Kurtz ZD, Müller CL, Miraldi ER, Littman DR, Blaser MJ, Bonneau RA. 2015. Sparse and  
606 Compositionally Robust Inference of Microbial Ecological Networks. *PLOS Computational*  
607 *Biology* 11:e1004226.
- 608 34. Yoon G, Gaynanova I, Müller CL. 2019. Microbial Networks in SPRING - Semi-parametric  
609 Rank-Based Correlation and Partial Correlation Estimation for Quantitative Microbiome  
610 Data. *Front Genet* 10.

- 611 35. Kolmogorov M, Yuan J, Lin Y, Pevzner PA. 2019. Assembly of long, error-prone reads using  
612 repeat graphs. 5. *Nature Biotechnology* 37:540–546.
- 613 36. Kolmogorov M, Bickhart DM, Behsaz B, Gurevich A, Rayko M, Shin SB, Kuhn K, Yuan J,  
614 Polevikov E, Smith TPL, Pevzner PA. 2020. metaFlye: scalable long-read metagenome  
615 assembly using repeat graphs. 11. *Nature Methods* 17:1103–1110.
- 616 37. Vaser R, Sović I, Nagarajan N, Šikić M. 2017. Fast and accurate de novo genome assembly  
617 from long uncorrected reads. *Genome Res* 27:737–746.
- 618 38. Kang DD, Li F, Kirton E, Thomas A, Egan R, An H, Wang Z. 2019. MetaBAT 2: an adaptive  
619 binning algorithm for robust and efficient genome reconstruction from metagenome  
620 assemblies. *PeerJ* 7.
- 621 39. Parks DH, Imelfort M, Skennerton CT, Hugenholtz P, Tyson GW. 2015. CheckM: assessing  
622 the quality of microbial genomes recovered from isolates, single cells, and metagenomes.  
623 *Genome Res* 25:1043–1055.
- 624 40. Hyatt D, Chen G-L, LoCascio PF, Land ML, Larimer FW, Hauser LJ. 2010. Prodigal: prokaryotic  
625 gene recognition and translation initiation site identification. *BMC Bioinformatics* 11:119.
- 626 41. Suzuki S, Ishida T, Ohue M, Kakuta M, Akiyama Y. 2017. GHOSTX: A Fast Sequence  
627 Homology Search Tool for Functional Annotation of Metagenomic Data, p. 15–25. *In* Kihara,  
628 D (ed.), *Protein Function Prediction: Methods and Protocols*. Springer, New York, NY.

- 629 42. Suzuki S, Kakuta M, Ishida T, Akiyama Y. 2014. GHOSTX: An Improved Sequence Homology  
630 Search Algorithm Using a Query Suffix Array and a Database Suffix Array. PLOS ONE  
631 9:e103833.
- 632 43. Kanehisa M, Araki M, Goto S, Hattori M, Hirakawa M, Itoh M, Katayama T, Kawashima S,  
633 Okuda S, Tokimatsu T, Yamanishi Y. 2008. KEGG for linking genomes to life and the  
634 environment. *Nucleic Acids Research* 36:D480–D484.
- 635 44. Glücksman E, Bell T, Griffiths RI, Bass D. 2010. Closely related protist strains have different  
636 grazing impacts on natural bacterial communities. *Environmental Microbiology* 12:3105–  
637 3113.
- 638 45. Bowers RM, Kyrpides NC, Stepanauskas R, Harmon-Smith M, Doud D, Reddy TBK, Schulz F,  
639 Jarett J, Rivers AR, Eloie-Fadrosh EA, Tringe SG, Ivanova NN, Copeland A, Clum A, Becraft ED,  
640 Malmstrom RR, Birren B, Podar M, Bork P, Weinstock GM, Garrity GM, Dodsworth JA,  
641 Yooseph S, Sutton G, Glöckner FO, Gilbert JA, Nelson WC, Hallam SJ, Jungbluth SP, Etema  
642 TJG, Tighe S, Konstantinidis KT, Liu W-T, Baker BJ, Rattei T, Eisen JA, Hedlund B, McMahon  
643 KD, Fierer N, Knight R, Finn R, Cochrane G, Karsch-Mizrachi I, Tyson GW, Rinke C, Lapidus A,  
644 Meyer F, Yilmaz P, Parks DH, Eren AM, Schriml L, Banfield JF, Hugenholtz P, Woyke T. 2017.  
645 Minimum information about a single amplified genome (MISAG) and a metagenome-  
646 assembled genome (MIMAG) of bacteria and archaea. 8. *Nature Biotechnology* 35:725–731.
- 647 46. Jurtshuk P, Mueller TJ, Acord WC. 1975. Bacterial Terminal Oxidases. *CRC Critical Reviews in*  
648 *Microbiology* 3:399–468.

- 649 47. Lin JT, Stewart V. 1997. Nitrate Assimilation by Bacteria, p. 1–30. *In* Poole, RK (ed.),  
650 Advances in Microbial Physiology. Academic Press.
- 651 48. Msimbira LA, Smith DL. 2020. The Roles of Plant Growth Promoting Microbes in Enhancing  
652 Plant Tolerance to Acidity and Alkalinity Stresses. *Front Sustain Food Syst* 4.
- 653 49. Delhaize E, Ryan PR. 1995. Aluminum Toxicity and Tolerance in Plants. *Plant Physiol*  
654 107:315–321.
- 655 50. Gupta N, Gaurav SS, Kumar A. 2013. Molecular Basis of Aluminium Toxicity in Plants: A  
656 Review. *American Journal of Plant Sciences* 2013.
- 657 51. Hänsch R, Mendel RR. 2009. Physiological functions of mineral micronutrients (Cu, Zn, Mn,  
658 Fe, Ni, Mo, B, Cl). *Current Opinion in Plant Biology* 12:259–266.
- 659 52. Millaleo R, Reyes- Diaz M, Ivanov AG, Mora ML, Alberdi M. 2010. MANGANESE AS  
660 ESSENTIAL AND TOXIC ELEMENT FOR PLANTS: TRANSPORT, ACCUMULATION AND  
661 RESISTANCE MECHANISMS. *Journal of soil science and plant nutrition* 10:470–481.
- 662 53. Liu Y, Riaz M, Yan L, Zeng Y, Cuncang J. 2019. Boron and calcium deficiency disturbing the  
663 growth of trifoliolate rootstock seedlings (*Poncirus trifoliolate* L.) by changing root architecture  
664 and cell wall. *Plant Physiology and Biochemistry* 144:345–354.
- 665 54. Brdar-Jokanović M. 2020. Boron Toxicity and Deficiency in Agricultural Plants. 4.  
666 *International Journal of Molecular Sciences* 21:1424.



- 667 55. Parvin K, Nahar K, Hasanuzzaman M, Bhuyan MHMB, Fujita M. 2019. Calcium-Mediated  
668 Growth Regulation and Abiotic Stress Tolerance in Plants, p. 291–331. *In* Hasanuzzaman, M,  
669 Hakeem, KR, Nahar, K, Alharby, HF (eds.), *Plant Abiotic Stress Tolerance: Agronomic,  
670 Molecular and Biotechnological Approaches*. Springer International Publishing, Cham.
- 671 56. Zhang X, Liu W, Zhang G, Jiang L, Han X. 2015. Mechanisms of soil acidification reducing  
672 bacterial diversity. *Soil Biology and Biochemistry* 81:275–281.
- 673 57. Wu Y, Zeng J, Zhu Q, Zhang Z, Lin X. 2017. pH is the primary determinant of the bacterial  
674 community structure in agricultural soils impacted by polycyclic aromatic hydrocarbon  
675 pollution. 1. *Scientific Reports* 7:40093.
- 676 58. Kéfi S, Domínguez-García V, Donohue I, Fontaine C, Thébault E, Dakos V. 2019. Advancing  
677 our understanding of ecological stability. *Ecology Letters* 22:1349–1356.
- 678 59. Borisov VB, Gennis RB, Hemp J, Verkhovsky MI. 2011. The cytochrome bd respiratory  
679 oxygen reductases. *Biochimica et Biophysica Acta (BBA) - Bioenergetics* 1807:1398–1413.
- 680 60. Korshunov S, Imlay KRC, Imlay JA. 2016. The cytochrome bd oxidase of *Escherichia coli*  
681 prevents respiratory inhibition by endogenous and exogenous hydrogen sulfide. *Molecular  
682 Microbiology* 101:62–77.
- 683 61. Zhao C, Gupta VV, S, R, Degryse F, Mclaughlin MJ. 2017. Effects of pH and ionic strength on  
684 elemental sulphur oxidation in soil. *Biology and Fertility of Soils* 53:247–256.

- 685 62. Giuffrè A, Borisov VB, Arese M, Sarti P, Forte E. 2014. Cytochrome bd oxidase and bacterial  
686 tolerance to oxidative and nitrosative stress. *Biochimica et Biophysica Acta (BBA) -*  
687 *Bioenergetics* 1837:1178–1187.
- 688 63. Cooper CE. 2002. Nitric oxide and cytochrome oxidase: substrate, inhibitor or effector?  
689 *Trends in Biochemical Sciences* 27:33–39.
- 690 64. Cole JA. 2018. Anaerobic Bacterial Response to Nitrosative Stress, p. 193–237. *In Advances*  
691 *in Microbial Physiology*. Elsevier.
- 692
- 693

694 Table 1. Bulk soil chemistry.

| 695 | <b>Plot</b>    | <b>pH</b>    | <b>Ca (ppm)</b> | <b>Mg (ppm)</b> | <b>P (ppm)</b> | <b>K (ppm)</b> | <b>OM (%)</b> | <b>CEC (mEq/100 g)</b> |
|-----|----------------|--------------|-----------------|-----------------|----------------|----------------|---------------|------------------------|
| 696 | Acid 1         | 5.1          | 641             | 54              | 560            | 98             | 3.6           | 11.4                   |
| 697 | Acid 2         | 4.9          | 401             | 40              | 470            | 78             | 3.8           | 12.8                   |
| 698 | Acid 3         | 5.2          | 816             | 54              | 567            | 88             | 3.9           | 12.0                   |
| 699 | <b>Mean</b>    | <b>5.1</b>   | <b>619</b>      | <b>49</b>       | <b>532</b>     | <b>88</b>      | <b>3.8</b>    | <b>12.1</b>            |
| 700 | Control 1      | 6.4          | 1,725           | 87              | 444            | 103            | 4.7           | 9.7                    |
| 701 | Control 2      | 6.5          | 2,039           | 85              | 517            | 76             | 4.1           | 10.8                   |
| 702 | Control 3      | 6.6          | 2,228           | 91              | 575            | 103            | 4.6           | 11.6                   |
| 703 | <b>Mean</b>    | <b>6.5</b>   | <b>1,997</b>    | <b>88</b>       | <b>512</b>     | <b>94</b>      | <b>4.5</b>    | <b>10.7</b>            |
| 704 | <b>P-value</b> | <b>0.001</b> | <b>0.01</b>     | <b>0.01</b>     | <b>ns</b>      | <b>ns</b>      | <b>0.05</b>   | <b>ns</b>              |

705 pH, mineral availability (determined by Mehlich-3 extraction), organic matter and cation  
706 exchange capacity of soil from the root zone of Canaan fir trees. Each value represents soil  
707 combined from four trees per plot. Statistical significances between acidified and control soil  
708 determined by non-paired t-test on non-transformed values.

709

710

711

| Module Accession Number                                                         | Module                                        | Reaction Catalysed                                         | Number of Components |
|---------------------------------------------------------------------------------|-----------------------------------------------|------------------------------------------------------------|----------------------|
| <b><i>Pathways in control metagenomes:absent or incomplete in acidified</i></b> |                                               |                                                            |                      |
| M00631                                                                          | D-Galacturonate degradation (bacteria)        | D-galacturonate => pyruvate + D-glyceraldehyde 3P          | 5                    |
| M00595                                                                          | Thiosulfate oxidation by SOX complex          | thiosulfate => sulfate                                     | 7                    |
| M00417                                                                          | Cytochrome o ubiquinol oxidase                | NA                                                         | 4                    |
| M00156                                                                          | Cytochrome c oxidase, cbb3-type               | NA                                                         | 5                    |
| M00535                                                                          | Isoleucine biosynthesis                       | pyruvate => 2-oxobutanoate                                 | 4                    |
| M00533                                                                          | Homoprotocatechuate degradation               | homoprotocatechuate => 2-oxohept-3-enedioate               | 4                    |
| M00896                                                                          | Thiamine biosynthesis, archaea                | Glycine (+ NAD+) => Thiamin monophosphate/diphosphate      | 5                    |
| M00365                                                                          | C10-C20 isoprenoid biosynthesis, archaea      | NA                                                         | 2                    |
| M00638                                                                          | Salicylate degradation                        | salicylate => gentisate                                    | 4                    |
| M00627                                                                          | beta-Lactam resistance, Bla system            | NA                                                         | 3                    |
| <b><i>Pathways in acidified metagenomes:absent or incomplete in control</i></b> |                                               |                                                            |                      |
| M00308                                                                          | Semi-phosphorylative Entner-Doudoroff pathway | gluconate => glycerate-3P                                  | 5                    |
| M00531                                                                          | Assimilatory nitrate reduction                | nitrate => ammonia                                         | 2                    |
| M00153                                                                          | Cytochrome bd ubiquinol oxidase               | NA                                                         | 3                    |
| M00546                                                                          | Purine degradation                            | xanthine => urea                                           | 12                   |
| M00034                                                                          | Methionine salvage pathway                    | NA                                                         | 13                   |
| M00845                                                                          | Arginine biosynthesis                         | glutamate => acetylcitrulline => arginine                  | 7                    |
| M00879                                                                          | Arginine succinyltransferase pathway          | arginine => glutamate                                      | 5                    |
| M00135                                                                          | GABA biosynthesis, eukaryotes                 | putrescine => GABA                                         | 4                    |
| M00044                                                                          | Tyrosine degradation                          | tyrosine => homogentisate                                  | 6                    |
| M00899                                                                          | Thiamine salvage pathway                      | HMP/HET => TMP                                             | 4                    |
| M00125                                                                          | Riboflavin biosynthesis, plants and bacteria  | GTP => riboflavin/FMN/FAD                                  | 7                    |
| M00572                                                                          | Pimeloyl-ACP biosynthesis, BioC-BioH pathway  | malonyl-ACP => pimeloyl-ACP                                | 7                    |
| M00141                                                                          | C1-unit interconversion, eukaryotes           | NA                                                         | 2                    |
| M00551                                                                          | Benzoate degradation                          | benzoate => catechol / methylbenzoate => methylcatechol    | 4                    |
| M00569                                                                          | Catechol meta-cleavage                        | catechol => acetyl-CoA / 4-methylcatechol => propanoyl-CoA | 10                   |
| M00698                                                                          | Multidrug resistance efflux pump BpeEF-OprC   | NA                                                         | 4                    |
| M00615                                                                          | Nitrate assimilation                          | NA                                                         | 4                    |

## Root tissue analysis

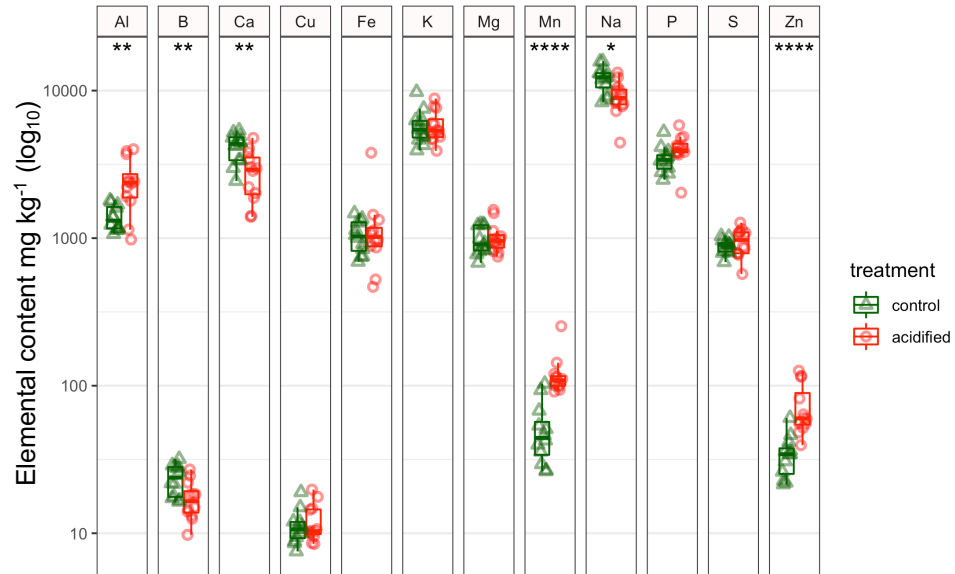

**Figure 1.** ICP-OES analysis of root tissue. Note that the roots were washed in a solution of phosphate buffered saline, which explains the high Na, P, and K values (see methods for formula). Thus, these values should only be considered relative to the acidification treatment. For both panels the significance of a t-test is denoted by the asterisks, which represent \*  $P \leq 0.05$ , \*\*  $P \leq 0.01$ , \*\*\*  $P \leq 0.001$ , \*\*\*\*  $P \leq 0.0001$ .

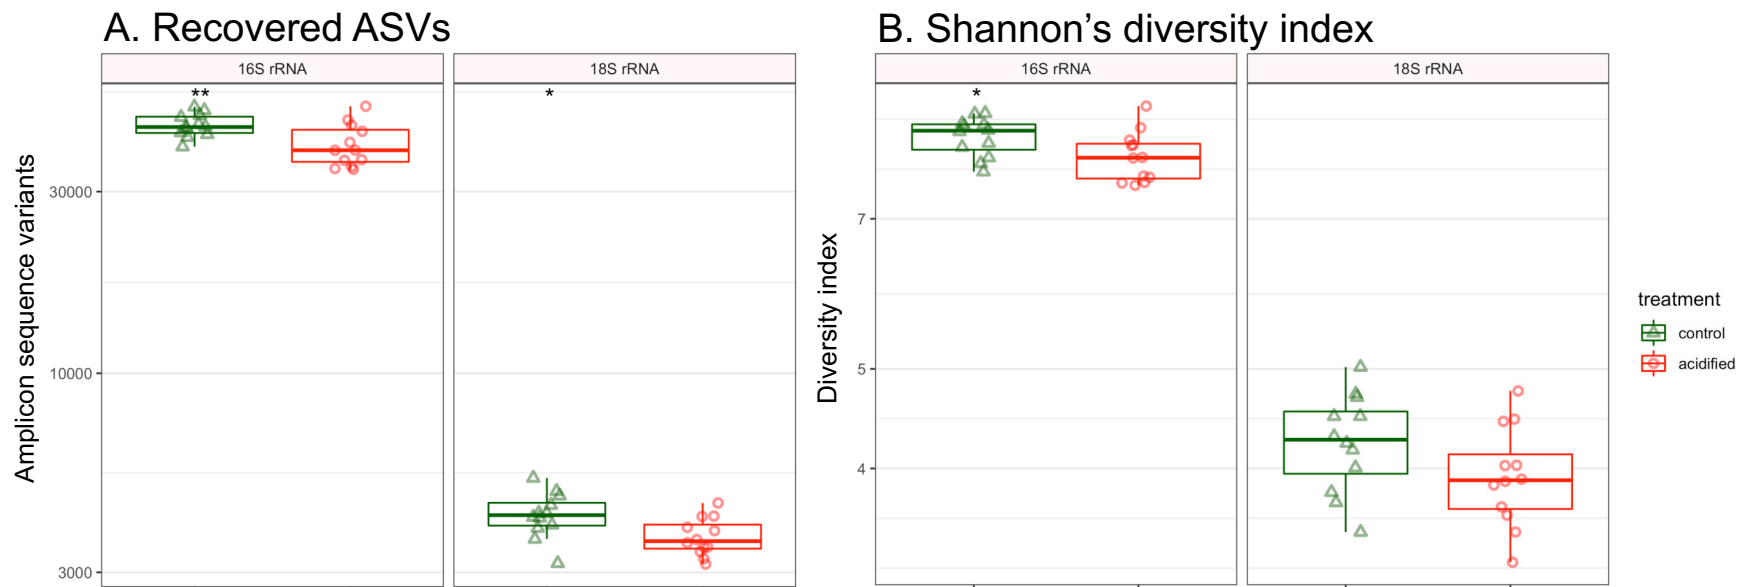

**Figure 2.** Alpha diversity of 16S rRNA and 18S rRNA gene datasets. **A.** Number of recovered ASVs. **B.** Shannon's diversity index based on ASV relative abundance. For both panels the significance of a t-test is denoted by the asterisks, which represent \*  $P \leq 0.05$ , \*\*  $P \leq 0.01$ .

### A. NMDS clustering

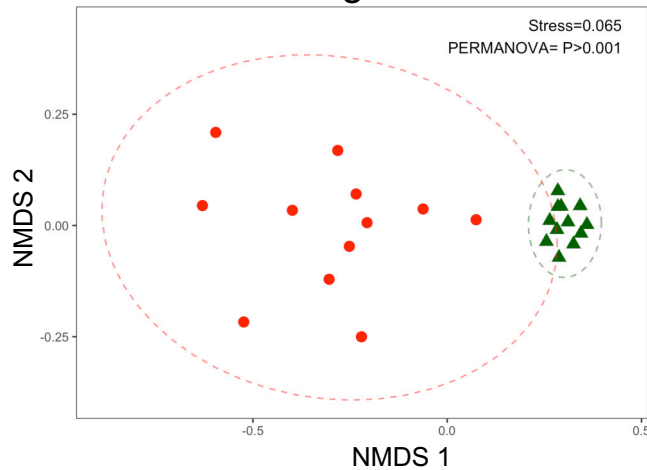

### B. Phylum level bins

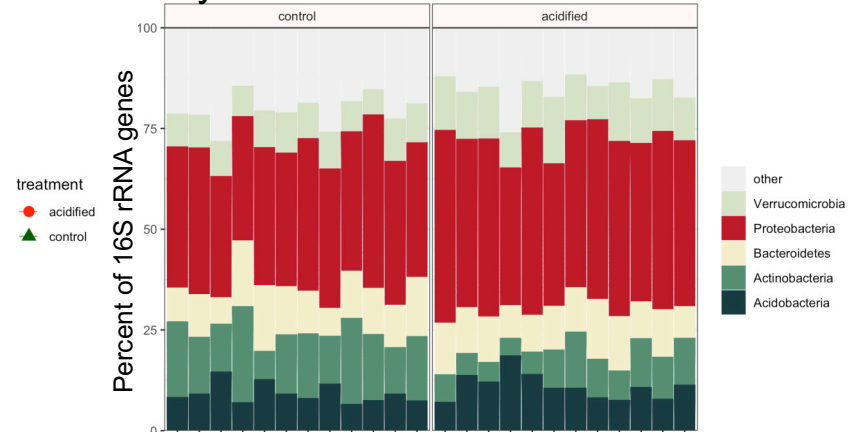

### C. Differentially abundant ASVs

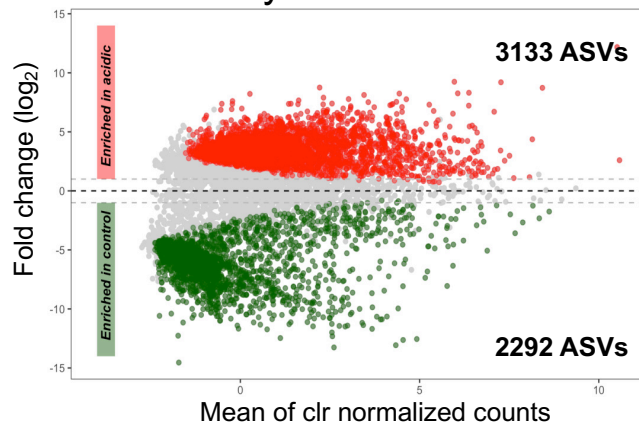

### D. Classification of DA ASVs

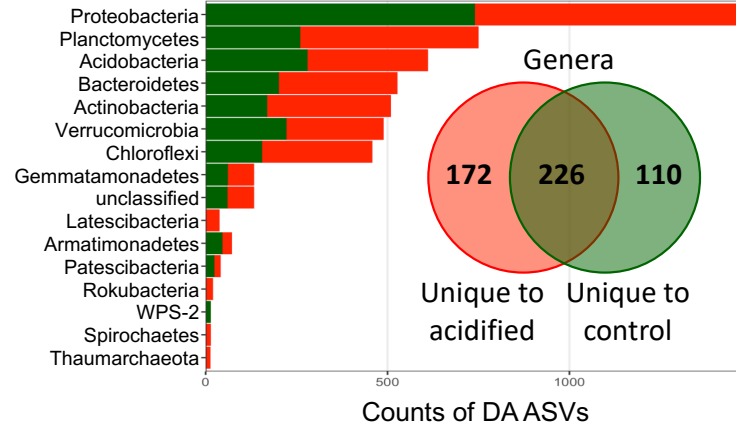

**Figure 3.** Composition of 16S rRNA gene datasets. **A.** Nonmetric multidimensional scaling ordination on ASV level data. The stress value of the ordination and P-value of a PERMANOVA statistical test are indicated. Ellipses denote 95% confidence intervals fitted onto the ordination. **B.** Phylum-level taxonomic bins in the datasets. Phyla consistently accounting for greater than 1% of sequence reads are displayed with the remainder assigned to the category “other”. A table of phyla showing statistically significant differences in relative abundance are shown in Table S1. **C.** MA plot displaying differentially abundant (DA) ASVs. The number of DA ASVs enriched in each condition are indicated in the inset text. **D.** Taxonomic classification of DA ASVs. Each bar represents the sum of DA ASVs classified to each Phylum. The inset Venn diagram shows ASVs classified to the genus level. The diagram shows the sum of genus level bins uniquely enriched in the control or acidified soils, with the overlap indicating genera with members enriched under both conditions.

### A. NMDS clustering

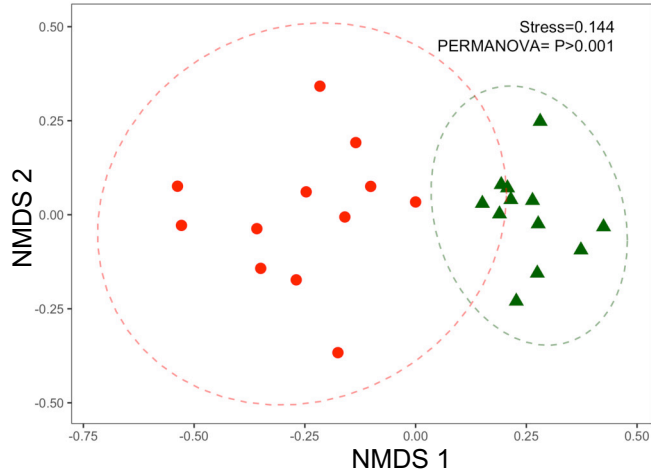

### B. Taxonomic bins

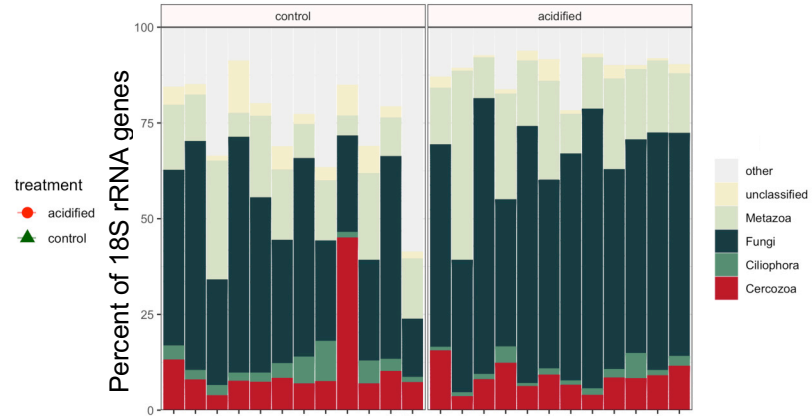

### C. Differentially abundant ASVs

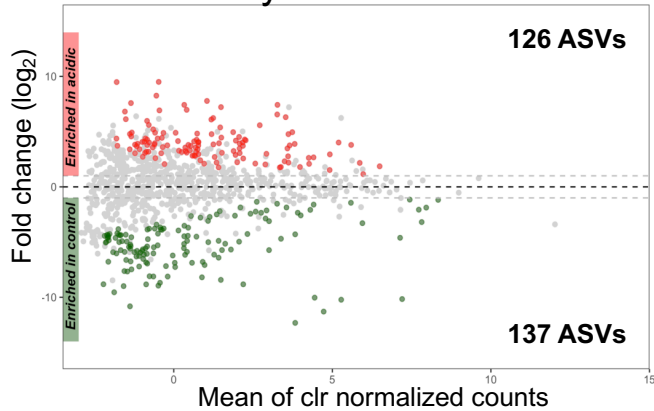

### D. Classification of DA ASVs

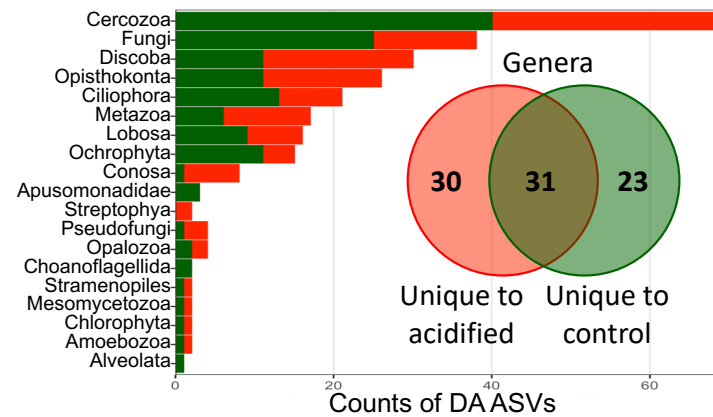

**Figure 4.** Composition of 18S rRNA gene datasets. **A.** Nonmetric multidimensional scaling ordination on ASV level data. The stress value of the ordination and P-value of a PERMANOVA statistical test are indicated. Ellipses denote 95% confidence intervals fitted onto the ordination. **B.** Taxonomic bins in the datasets. Taxa consistently accounting for greater than 1% of sequence reads are displayed with the remainder assigned to the category “other”. A table of taxa showing statistically significant differences in relative abundance are shown in Table S1. **C.** MA plot displaying differentially abundant (DA) ASVs. The number of DA ASVs enriched in each condition are indicated in the inset text. **D.** Taxonomic classification of DA ASVs. Each bar represents the sum of DA ASVs classified to each taxa. The inset Venn diagram shows ASVs classified to the genus level. The diagram shows the sum of genus level bins uniquely enriched in the control or acidified soils, with the overlap indicating genera with members enriched under both conditions.



## A. Co-occurrence networks

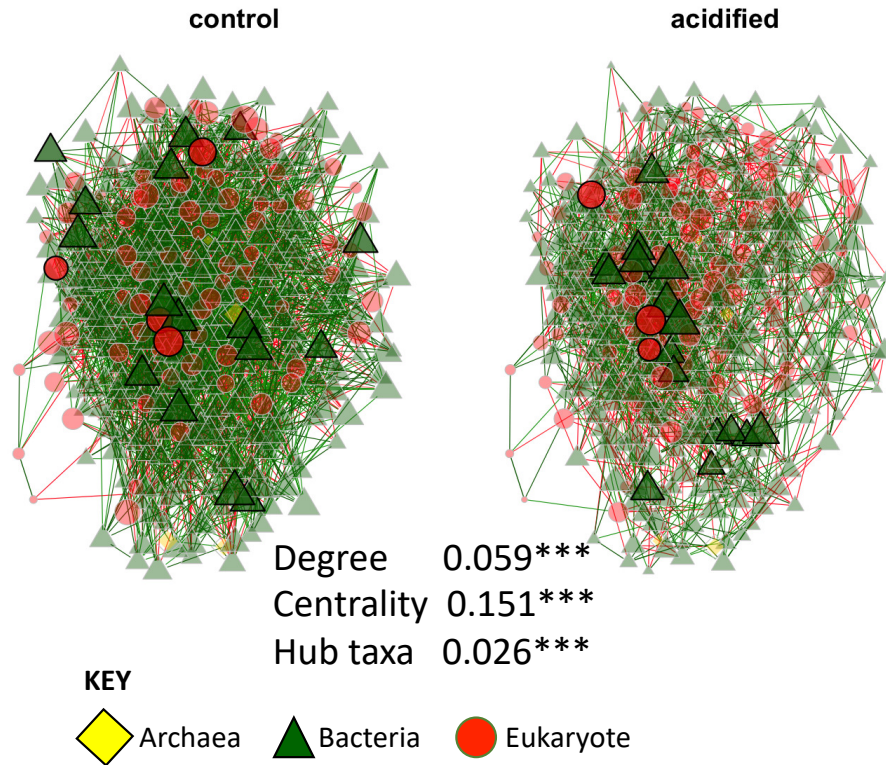

## B. Central nodes

| Kingdom                     | Phylum          | Centrality in control | Centrality in acidified |
|-----------------------------|-----------------|-----------------------|-------------------------|
| <b>Central in control</b>   |                 |                       |                         |
| Bacteria                    | Rokubacteria    | 1                     | 0.762                   |
| Bacteria                    | Acidobacteria   | 0.964                 | 0.527                   |
| Bacteria                    | Planctomycetes  | 0.923                 | 0.498                   |
| Bacteria                    | Rokubacteria    | 0.919                 | 0.504                   |
| Bacteria                    | Latescibacteria | 0.889                 | 0.447                   |
| <b>Central in acidified</b> |                 |                       |                         |
| Bacteria                    | Verrucomicrobia | 0.458                 | 1                       |
| Bacteria                    | Proteobacteria  | 0.516                 | 0.973                   |
| Eukaryota                   | Nematoda        | 0.811                 | 0.92                    |
| Bacteria                    | Proteobacteria  | 0.452                 | 0.907                   |
| Eukaryota                   | Oomycota        | 0.398                 | 0.906                   |

**Figure 5.** Network analysis. **A.** Each node represents an ASV colored and shaped by the Kingdom to which it belongs. Network connections are colored by their association direction. Positive associations (green) and negative associations (red). The size of the nodes denotes the centrality of the taxon, with larger nodes having the most connections. The absolute difference in degree, eigenvector centrality, and hub taxa measures between the two networks are indicated. Each value was statistically significantly different with a P-value  $\leq 0.001$  (indicated by the asterisks). **B.** List of the top five most central nodes in the control and acidified soils. Each line represents an individual ASV. The Kingdom and Phylum level classification of each ASV is indicated. The eigenvector centrality which was used to rank the centrality of the ASVs is also displayed.
